# Supplementary material for: Residual stress modulation as a pathway to reliable multilevel 3D NAND flash storage
Source: Royal Society of Chemistry journal article supplement (doi:10.1039/d6na00054a), 2026-05-29
Supplement: d6na00054a1.pdf [file d6na00054a1.pdf]

## Supplementary Information

### **Residual Stress Modulation as a Pathway to Reliable Multilevel 3D NAND Flash Storage**

*Ruifu Zhou<sup>1</sup>, Ik-Jyae Kim<sup>1</sup>, Sejun Park<sup>2</sup>, Hyukchang Kwon<sup>2</sup>, and Jang-Sik Lee<sup>1</sup>*

<sup>1</sup>Pohang University of Science and Technology (POSTECH), Pohang 37673, Korea

<sup>2</sup>Device Solutions, Samsung Electronics Co., Hwaseong 18448, Korea

Corresponding author: Jang-Sik Lee (e-mail: [jangsik@postech.ac.kr](mailto:jangsik@postech.ac.kr)).

**Table S1.** Mechanical parameters used in the simulation.

| Material                       | CTE ( $10^{-6}/\text{K}$ ) | Young's modulus (GPa) | Poisson's ratio |
|--------------------------------|----------------------------|-----------------------|-----------------|
| SiO <sub>2</sub>               | 1                          | 59                    | 0.24            |
| SiN                            | 3                          | 260                   | 0.23            |
| Poly-Si                        | 2.8                        | 164                   | 0.24            |
| W                              | 4.6                        | 410                   | 0.28            |
| Al <sub>2</sub> O <sub>3</sub> | 8.18                       | 390                   | 0.22            |
| TiN                            | 10.8                       | 410                   | 0.27            |

**Table S2.** Trap parameters of the charge-trap nitride (CTN) used in the simulation.

| Trap Parameter                                                                  | Used in simulation     |
|---------------------------------------------------------------------------------|------------------------|
| Density of acceptor-like traps, $N_{TA}$ ( $\text{cm}^{-3}$ )                   | $6.00 \times 10^{19}$  |
| Peak energy level of acceptor-like traps, $E_{TA}$<br>from conduction band (eV) | 1.40                   |
| Capture cross section of acceptor-like traps,<br>$CCS_A$ ( $\text{cm}^2$ )      | $3.00 \times 10^{-14}$ |
| Standard deviation of acceptor-like traps, $\sigma_A$<br>(eV)                   | 0.2                    |
| Density of donor-like traps, $N_{TD}$ ( $\text{cm}^{-3}$ )                      | $6.00 \times 10^{19}$  |
| Peak energy level of donor-like traps, $E_{TD}$<br>from valence band (eV)       | 1.36                   |
| Capture cross section of donor-like traps,<br>$CCS_D$ ( $\text{cm}^2$ )         | $1.50 \times 10^{-14}$ |
| Standard deviation of donor-like traps, $\sigma_D$<br>(eV)                      | 0.2                    |

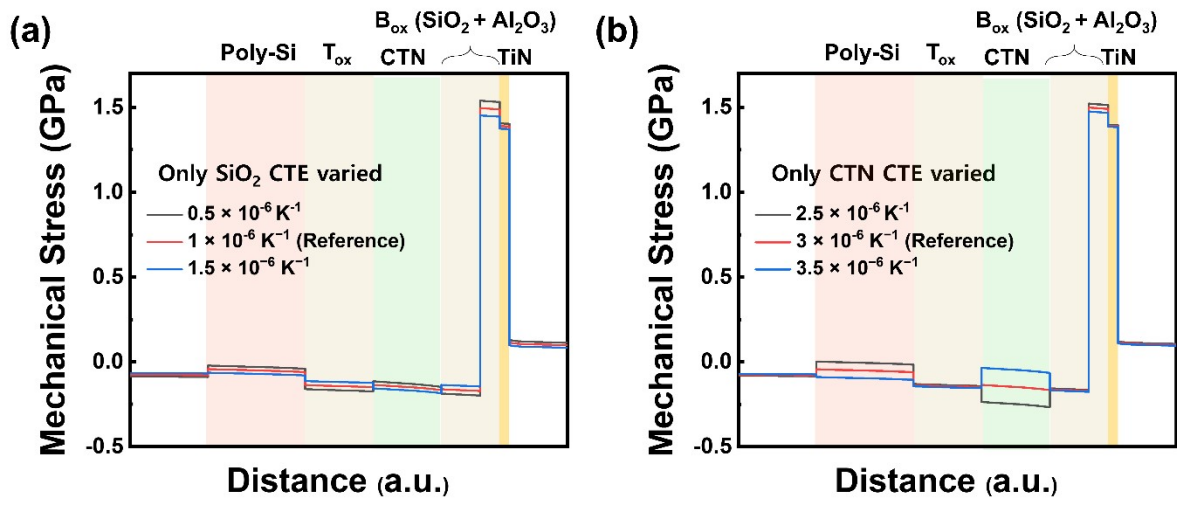

**Fig. S1.** Effect of the CTE of  $SiO_2$  and CTN on the simulated residual stress distribution. (a) Residual stress distribution obtained by varying the CTE of  $SiO_2$ . (b) Residual stress distribution obtained by varying the CTE of CTN.

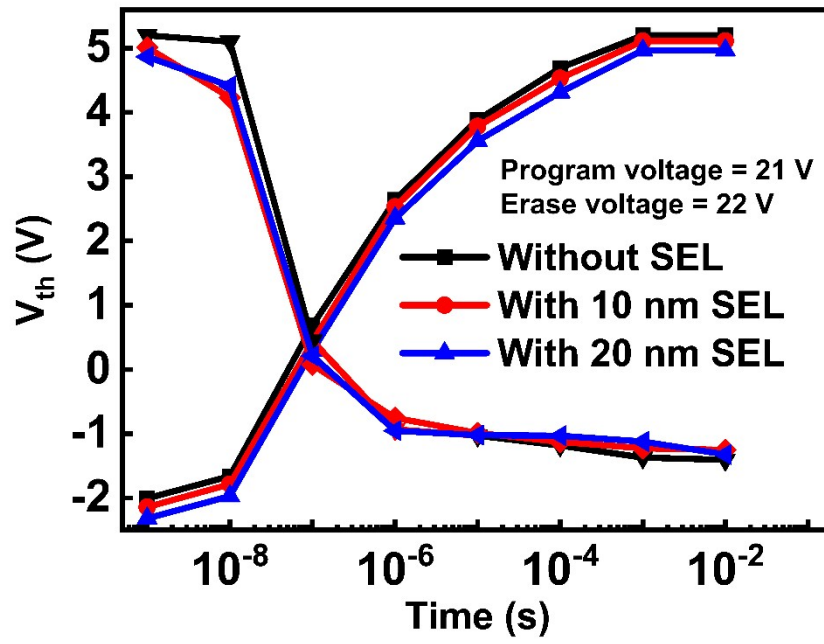

**Fig. S2.** Simulated  $V_T$  evolution during program and erase operations for the reference structure and structures with 10- or 20-nm SELs.

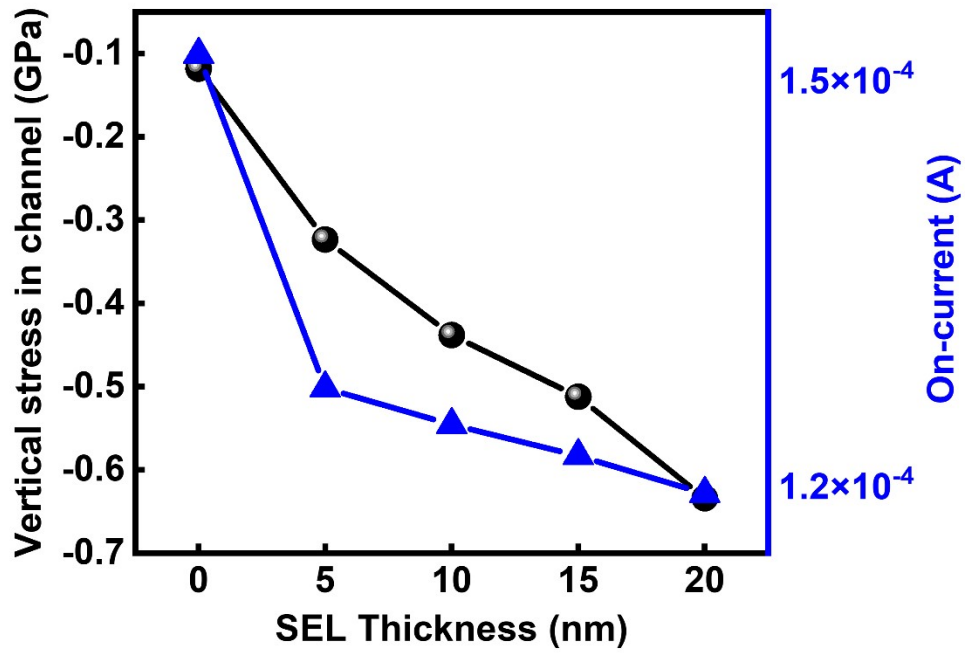

Fig. S3. SEL-thickness-dependent vertical channel stress and on-current.
